# Supplementary material
Source: PubMed Central journal article supplement (PMC1297672)

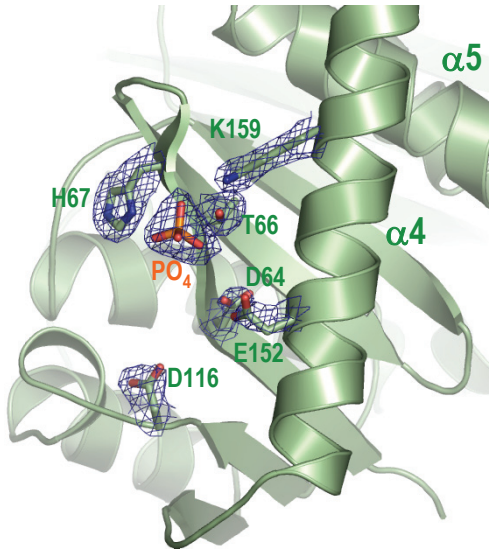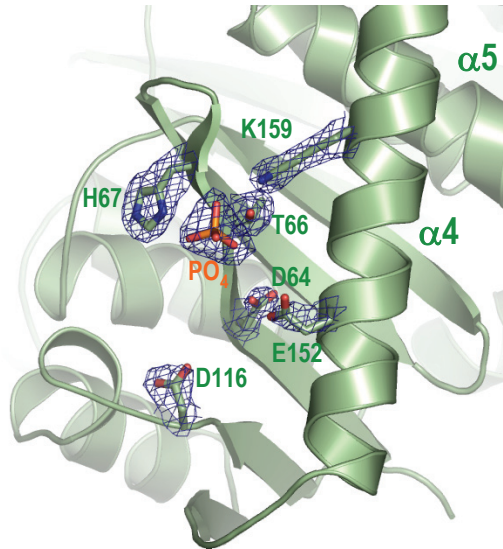

Supplement: pnas_0506924102_1.pdf [file pnas_0506924102_1.pdf]
